# Supplementary material for: A Cancer-Specific Monoclonal Antibody against Podocalyxin Exerted Antitumor Activities in Pancreatic Cancer Xenografts
Source: Preprints.org preprint supplement (doi:10.20944/preprints202310.1348.v1), 2023-10-20
Supplement: Supplementary file 1 [file supplementary]

**Supporting Information**

Supplementary Figure S1

**Supplementary Figure S1.** Body appearance in MIA PaCa-2 (A), Capan-2 (B), and PK-45H (C) xenografts-implanted mice treated with control mIgG or PcMab-6-mG2a-f on day 25 (PK-45H) or day 28 (MIA PaCa-2 and Capan-2) after cell implantation. Scale bar, 1 cm.

Supplementary Figure S2

**Supplementary Figure S2.** Body appearance in MIA PaCa-2 (A), Capan-2 (B), and PK-45H (C) xenografts-implanted mice treated with control hIgG or humPcMab-6-f on day 21. Scale bar, 1 cm.
